# Supplementary material for: Pomolic acid alleviates CCl4‑induced liver fibrosis in mice by suppressing β-arrestin 2-mediated M2 macrophage polarization
Source: Research Square preprint supplement (doi:10.21203/rs.3.rs-7845428/v1), 2025-11-10
Supplement: Supplementary file 1 [file 90d9465b11ec0818f4a12c59.pdf]

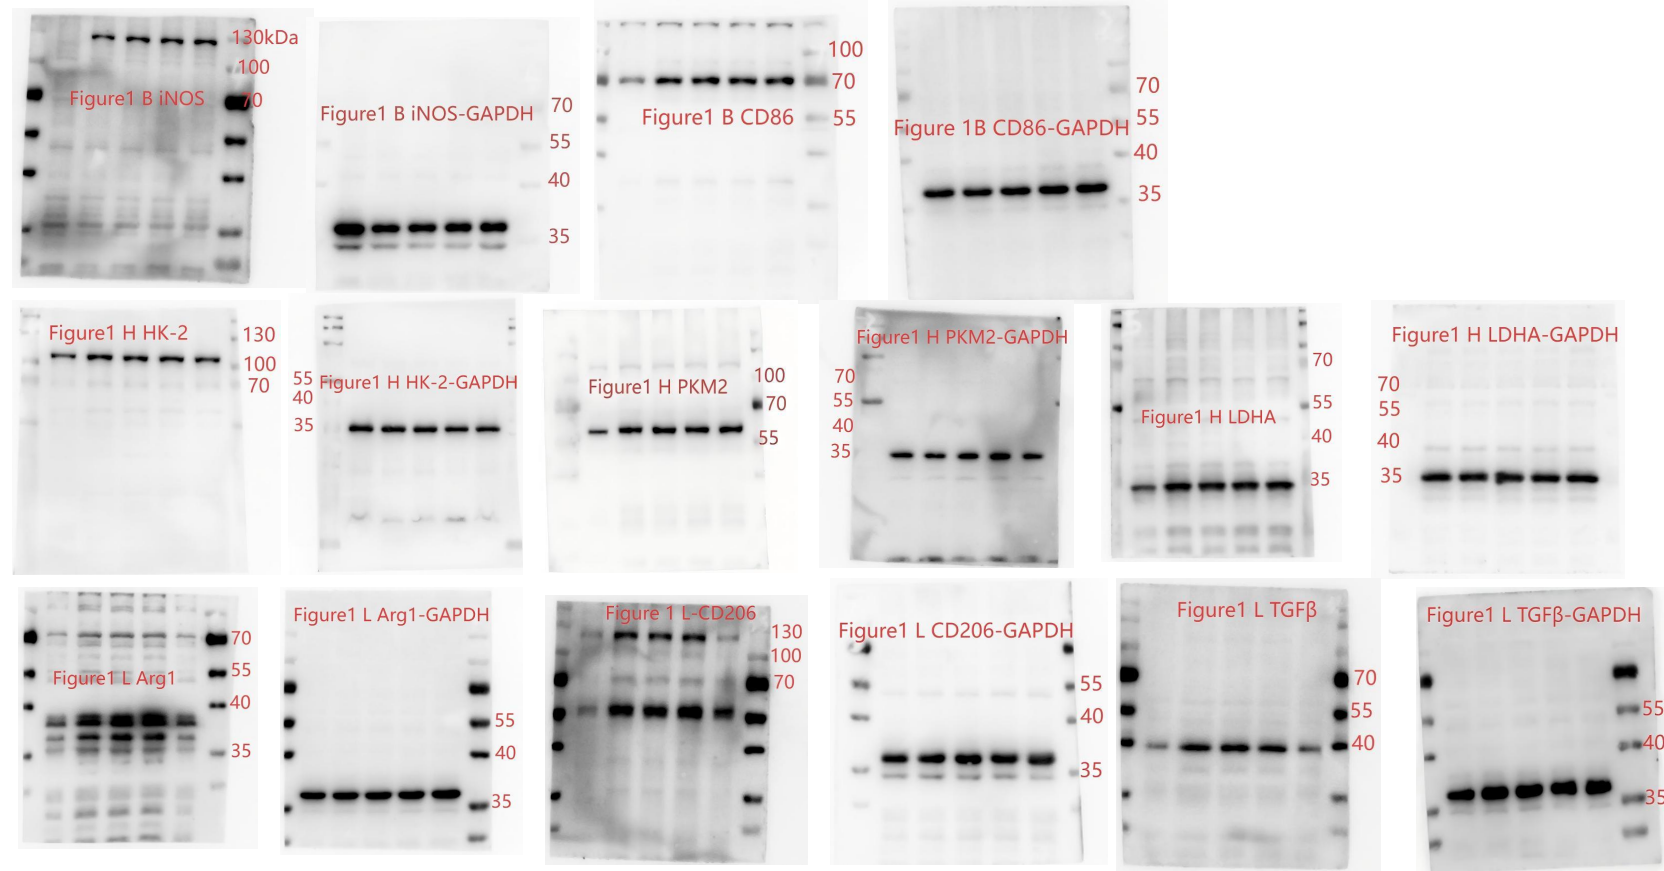

Figure1Uncropped western blots

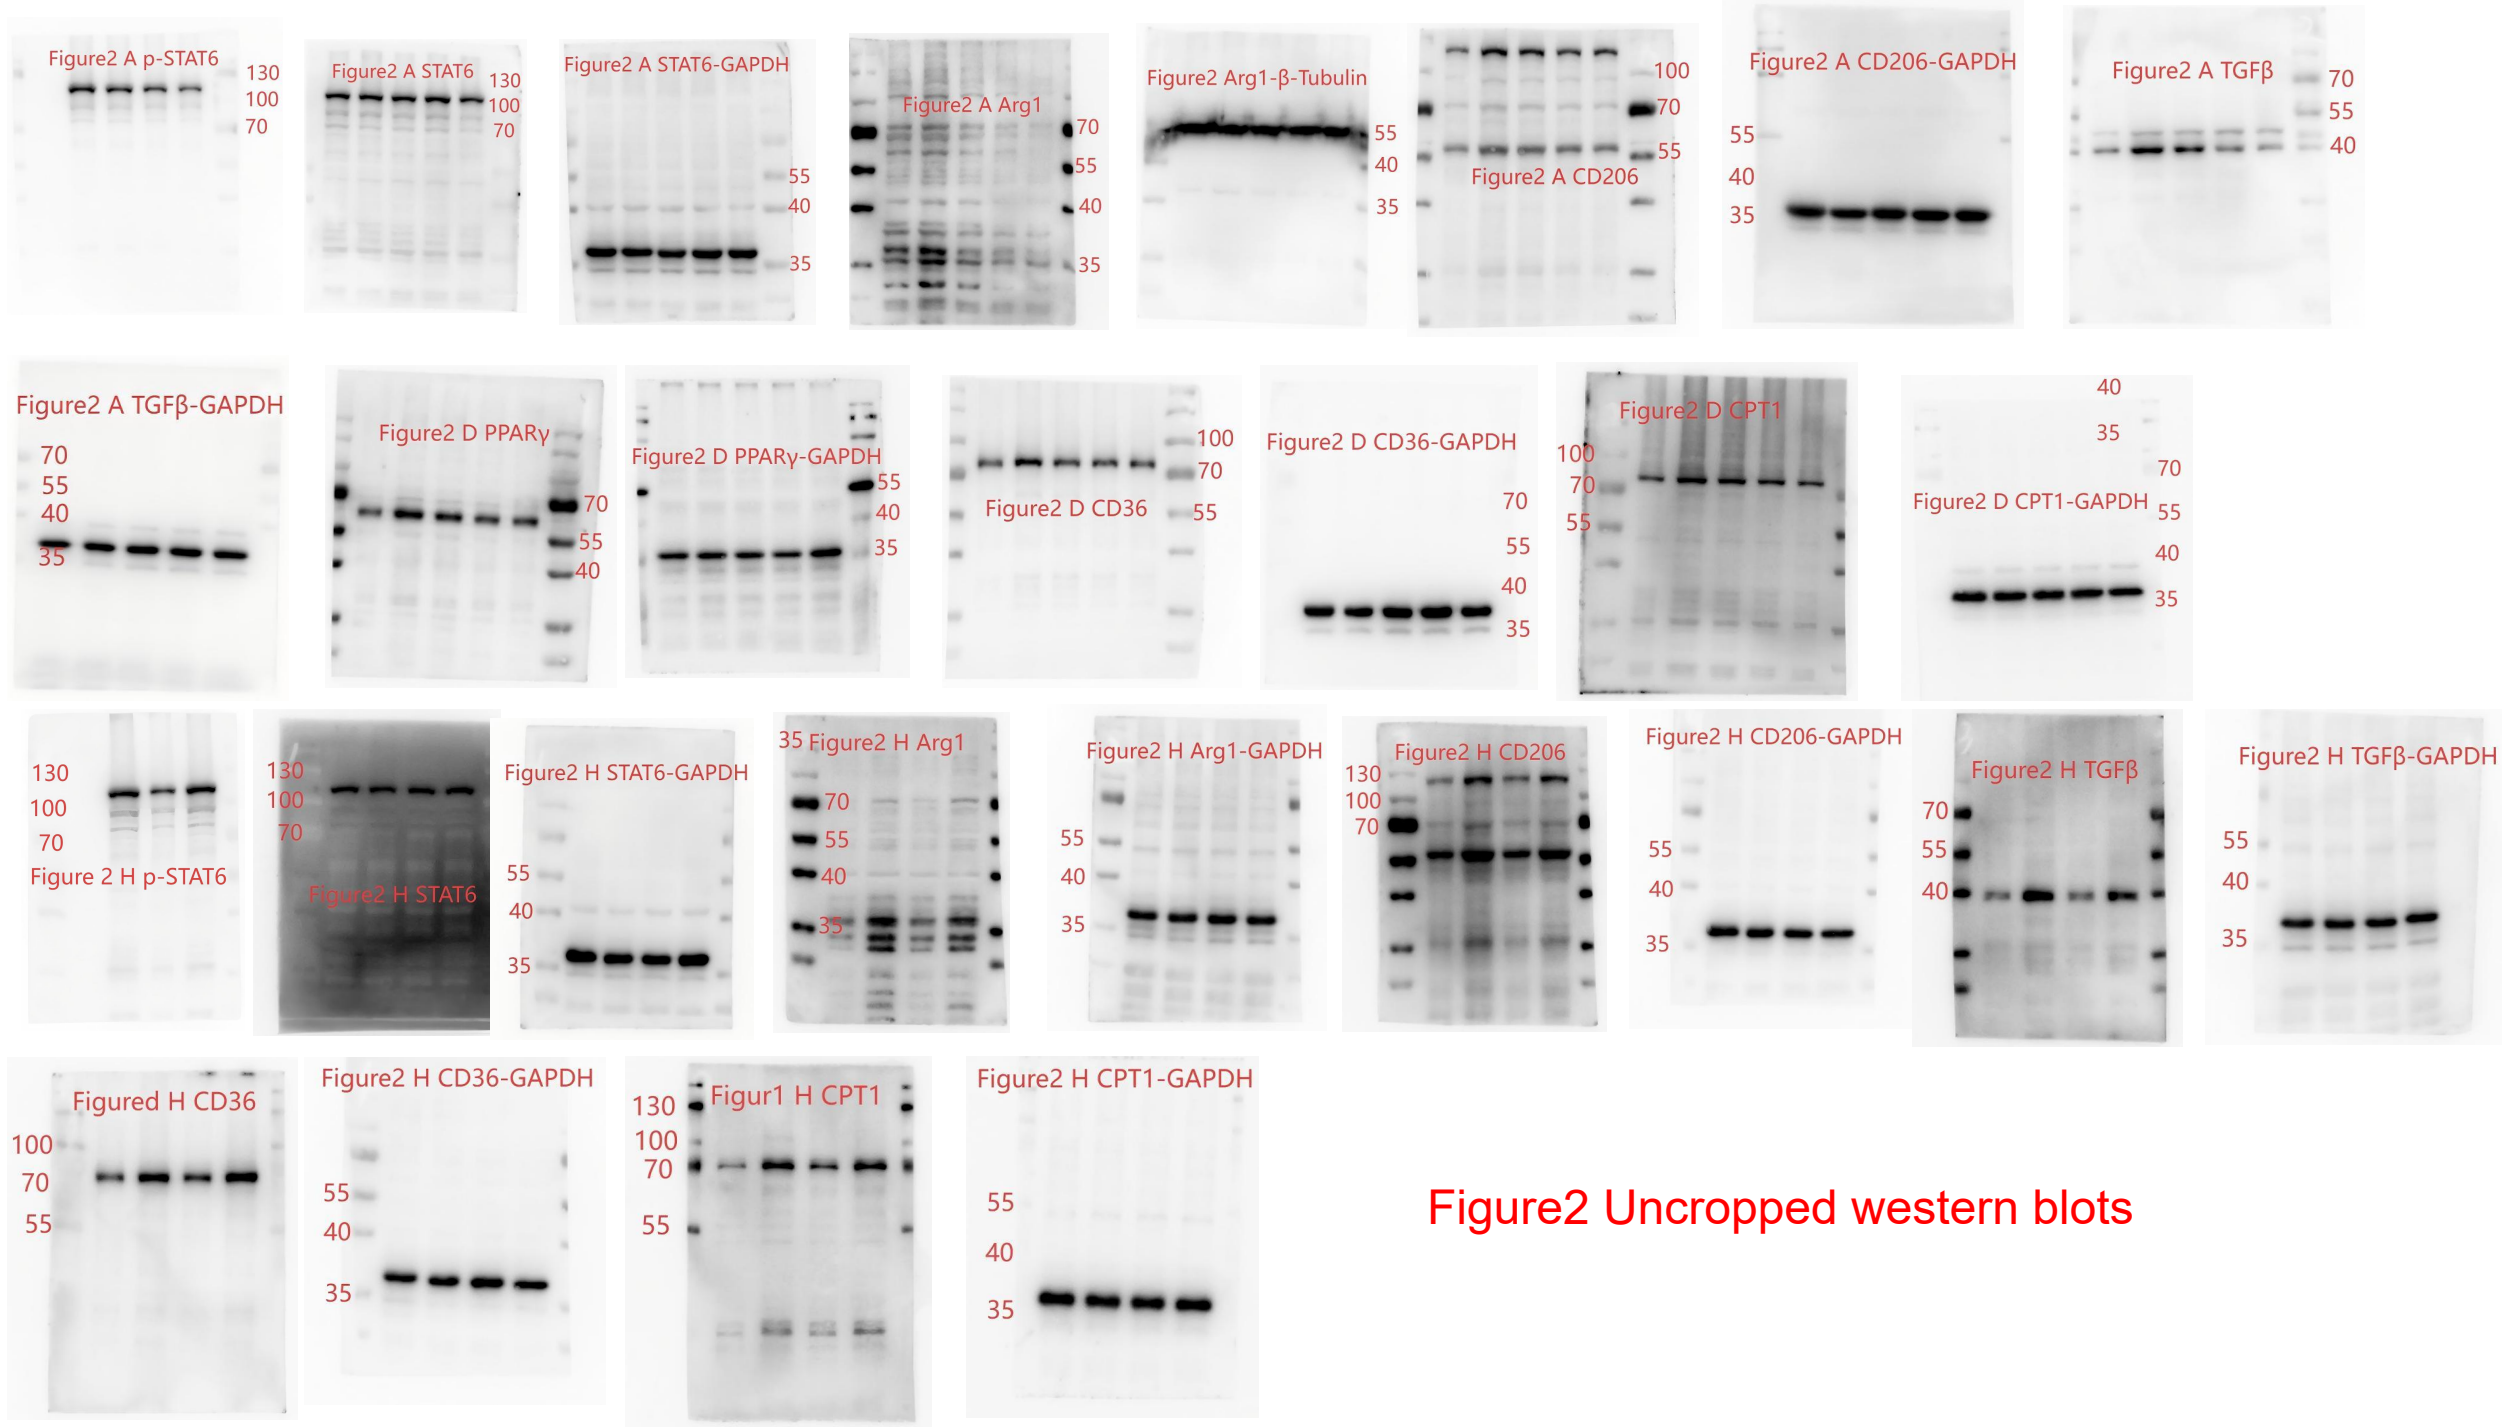

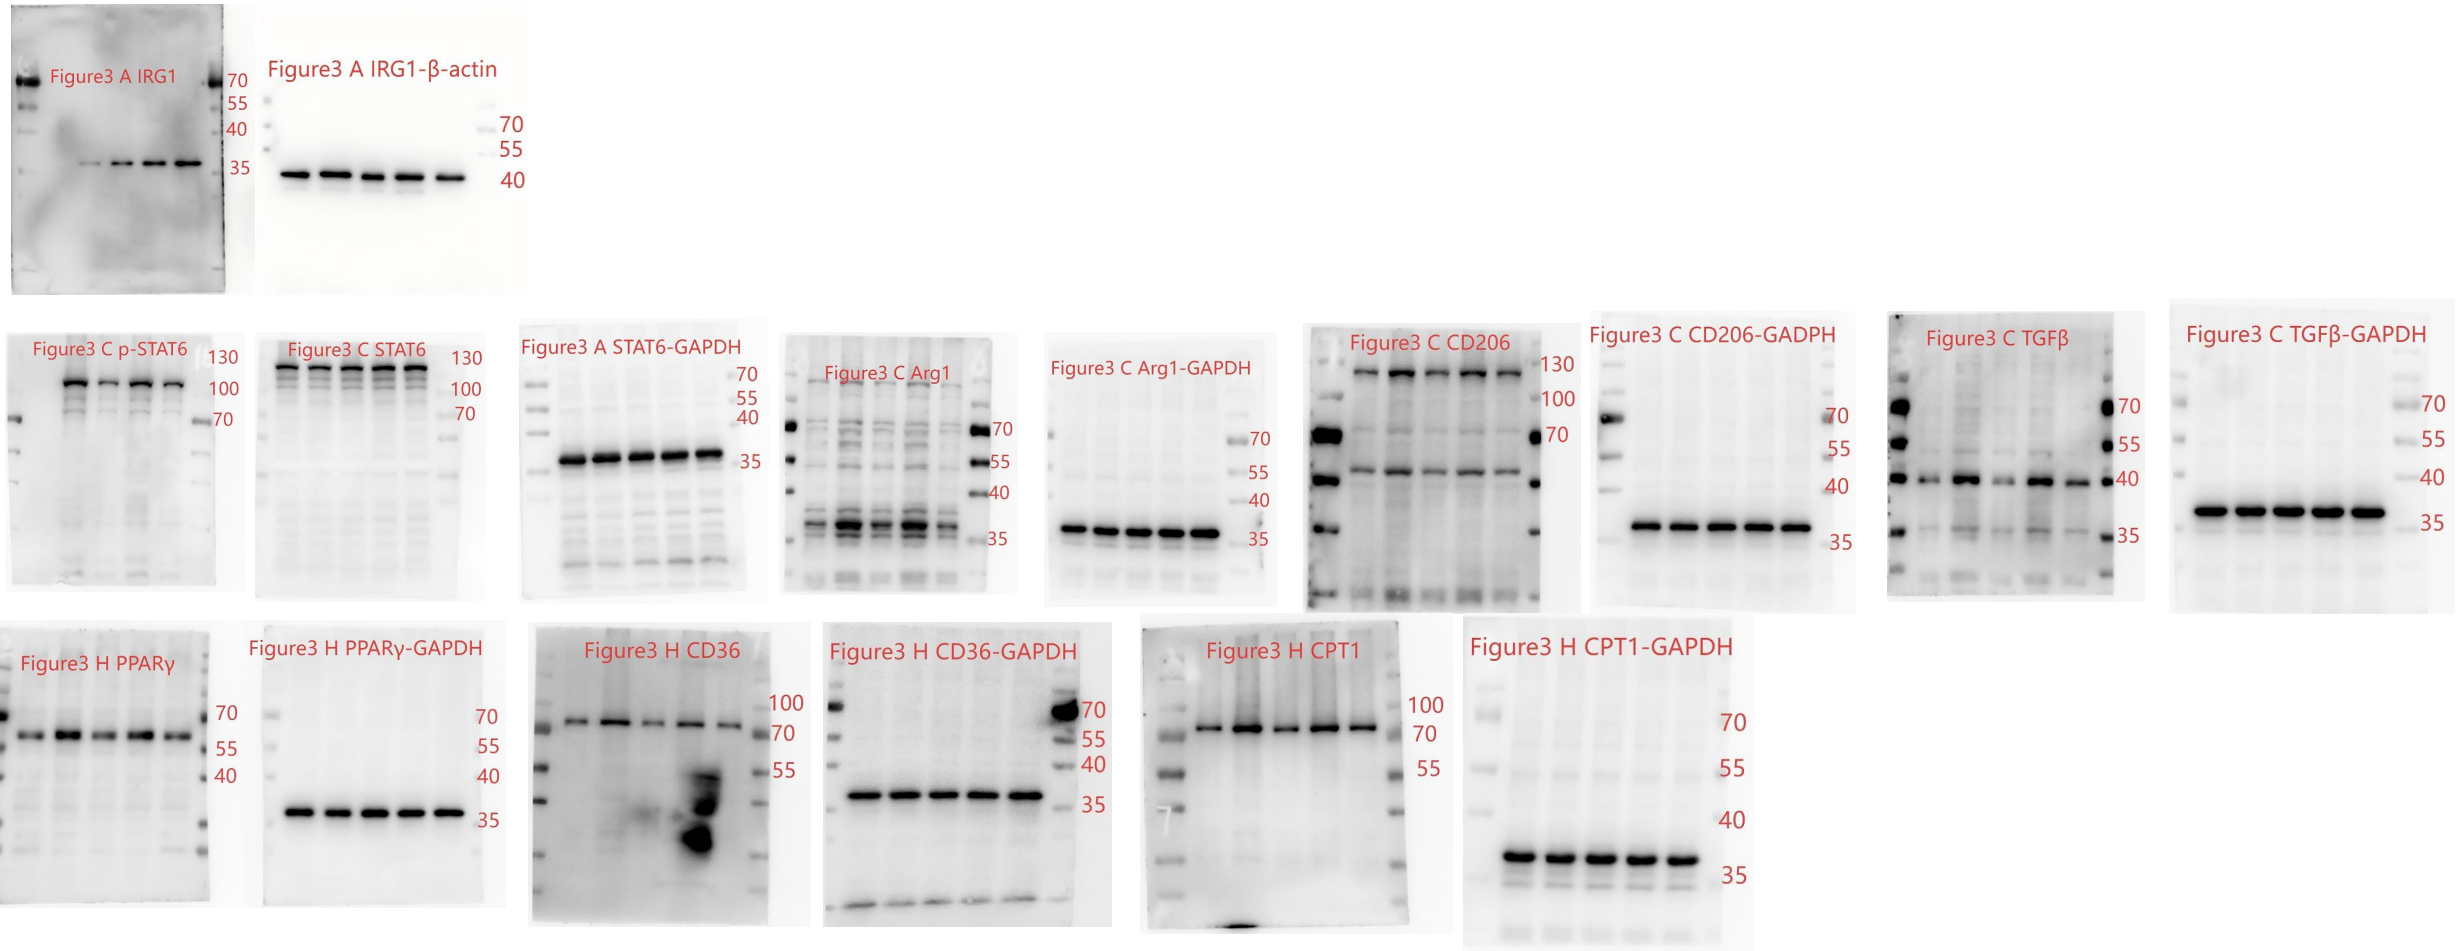

Figure3 Uncropped western blots

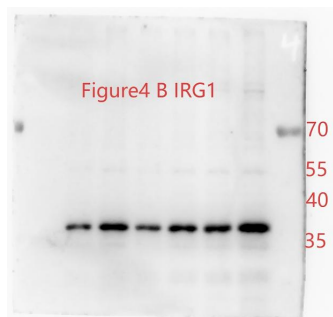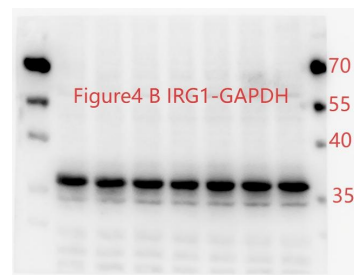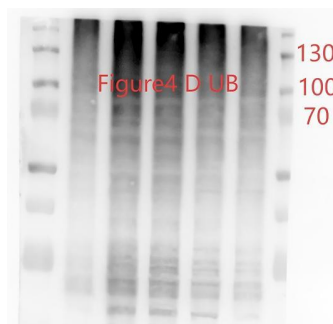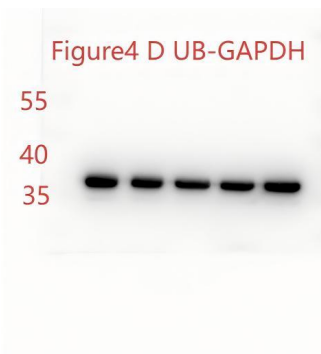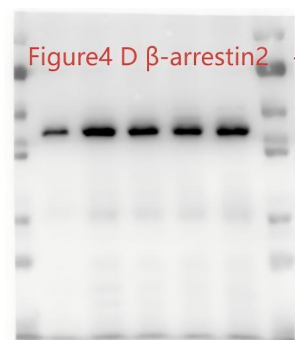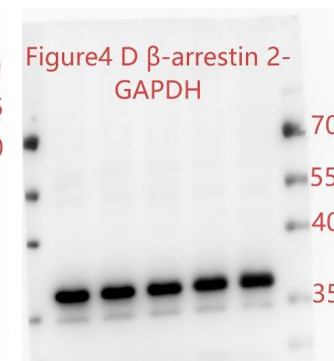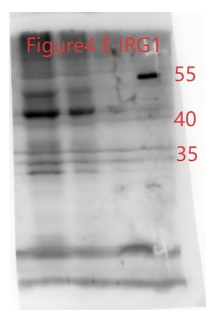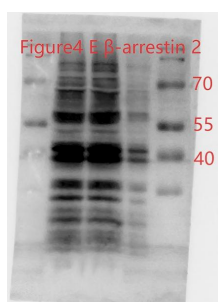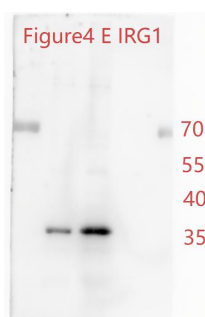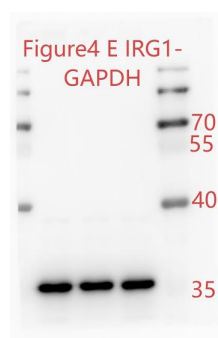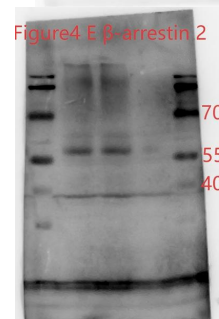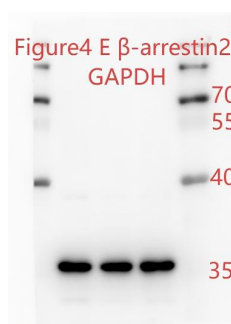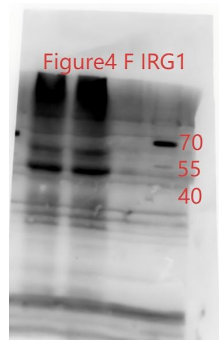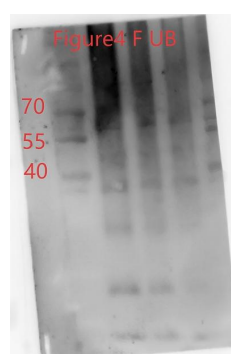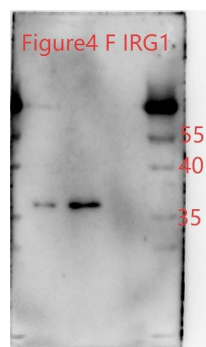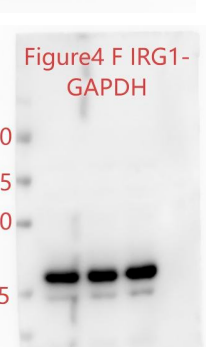

Figure4 Uncropped western blots



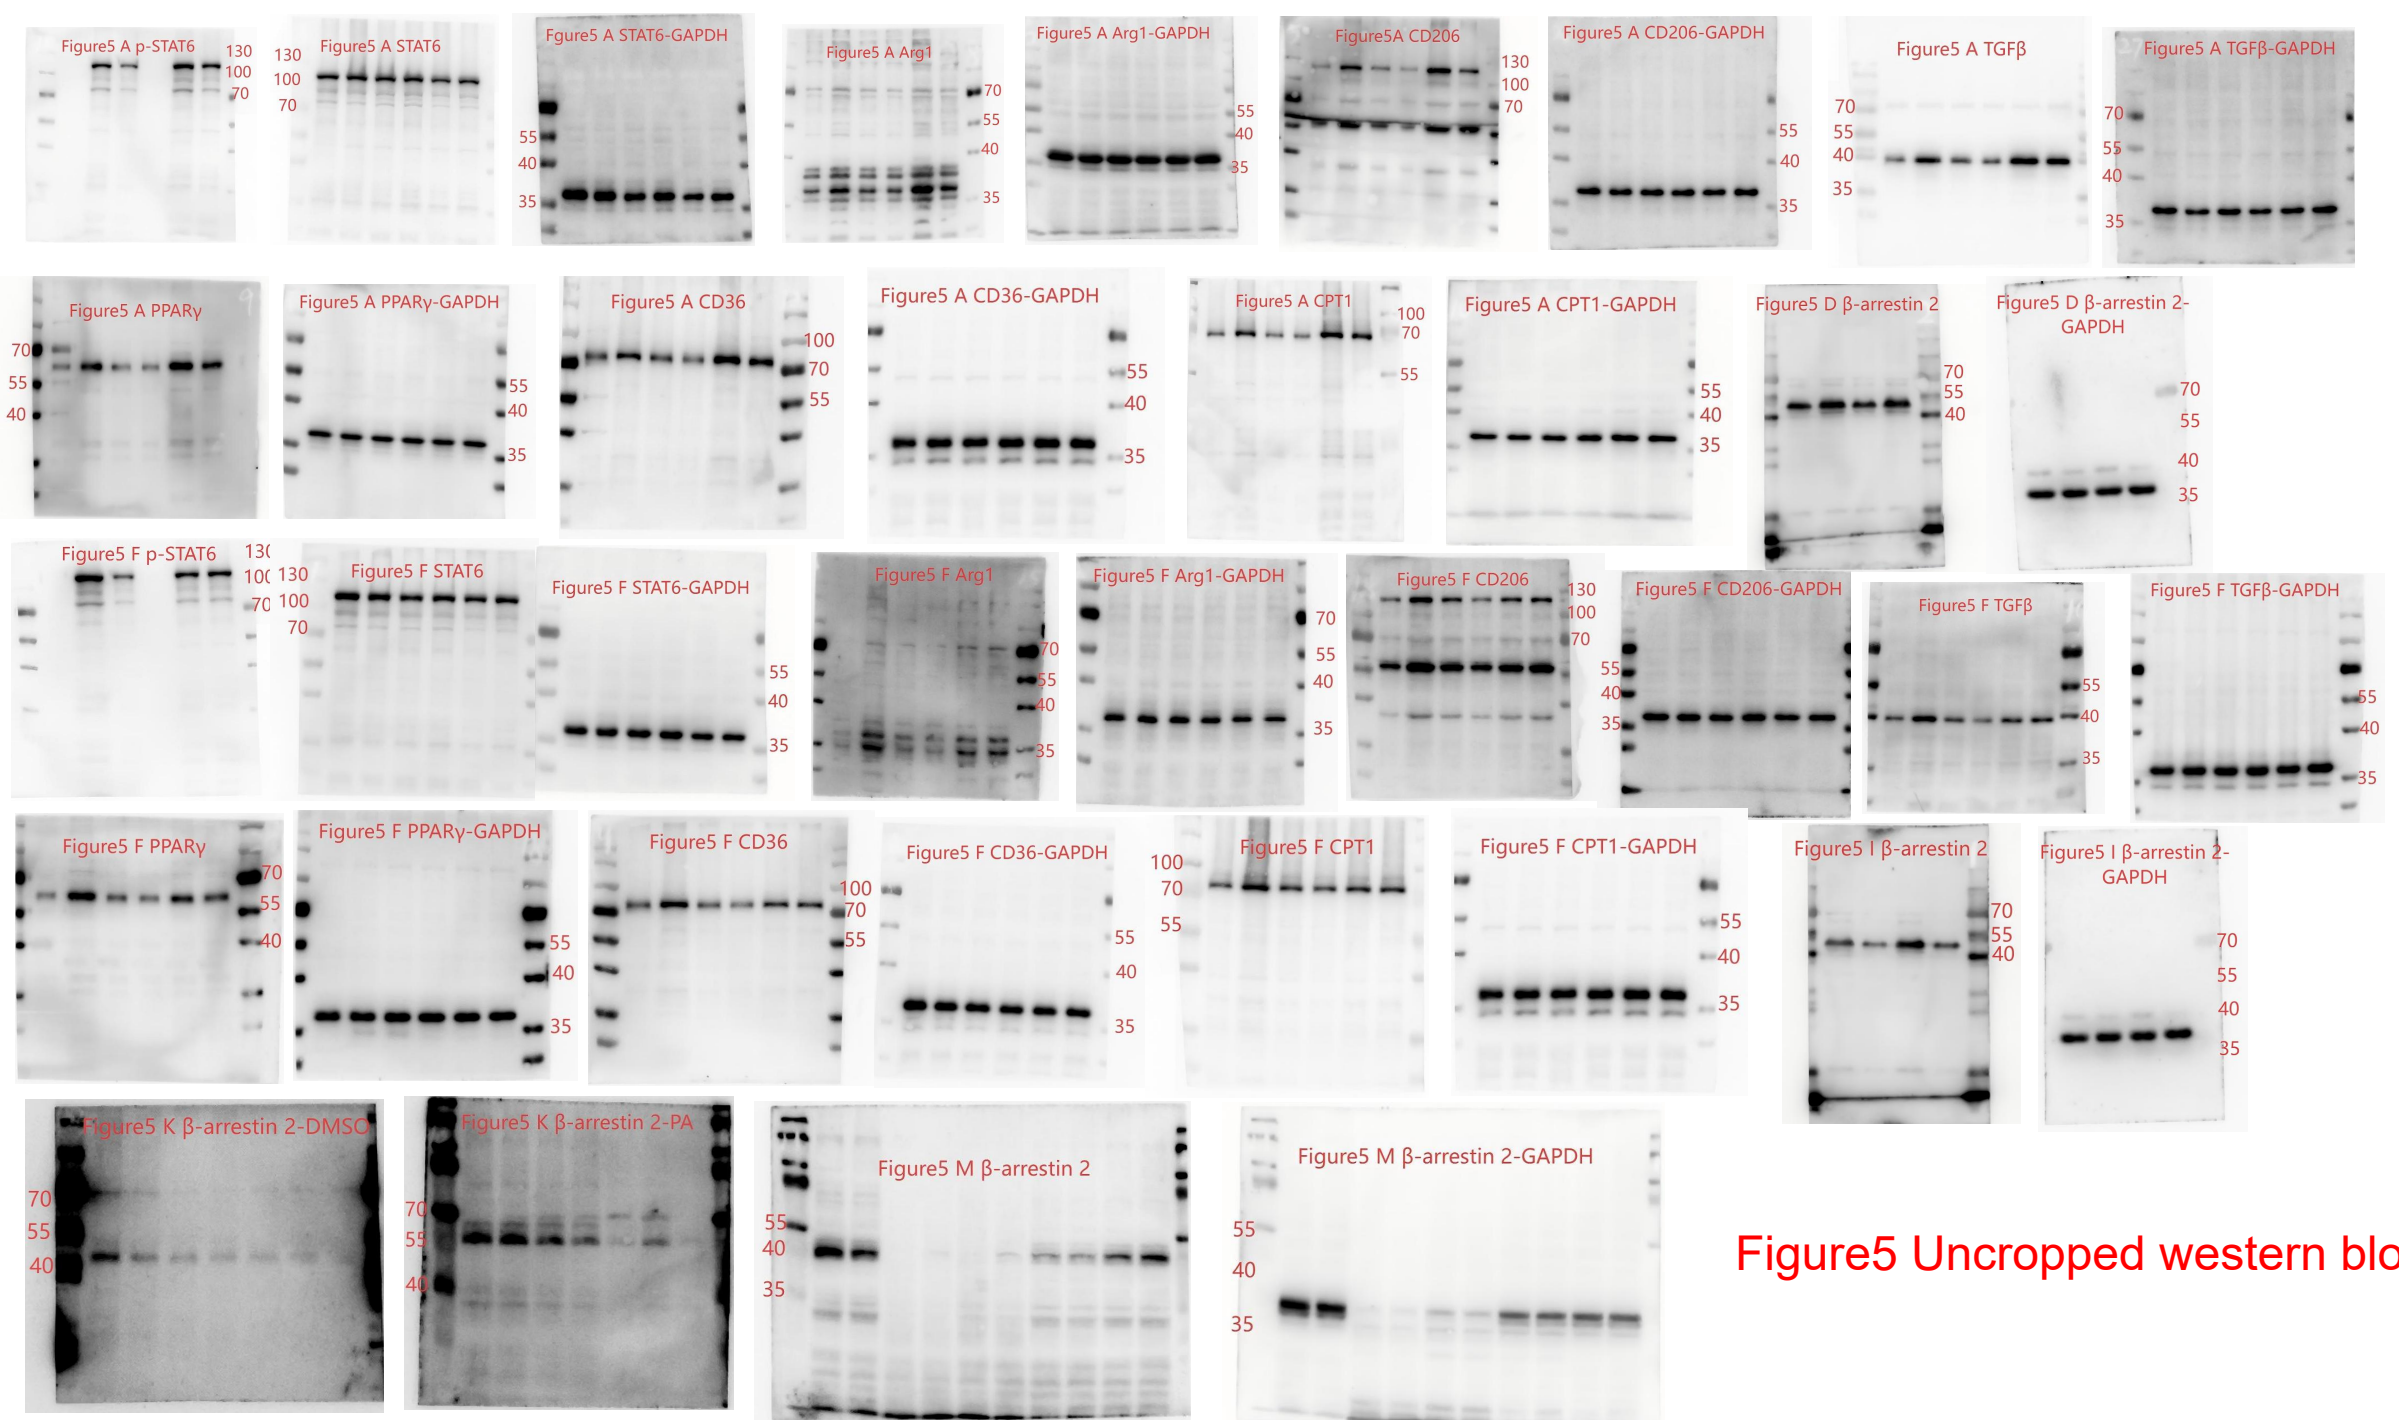

Figure5 Uncropped western blots

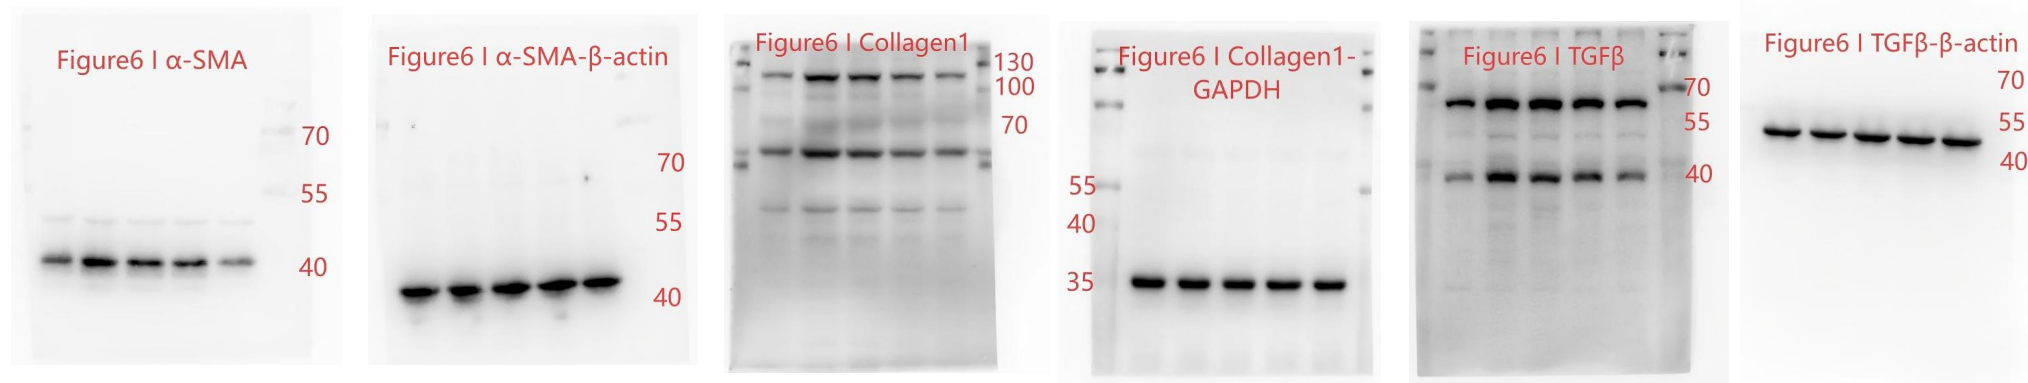

Figure6 Uncropped western blots

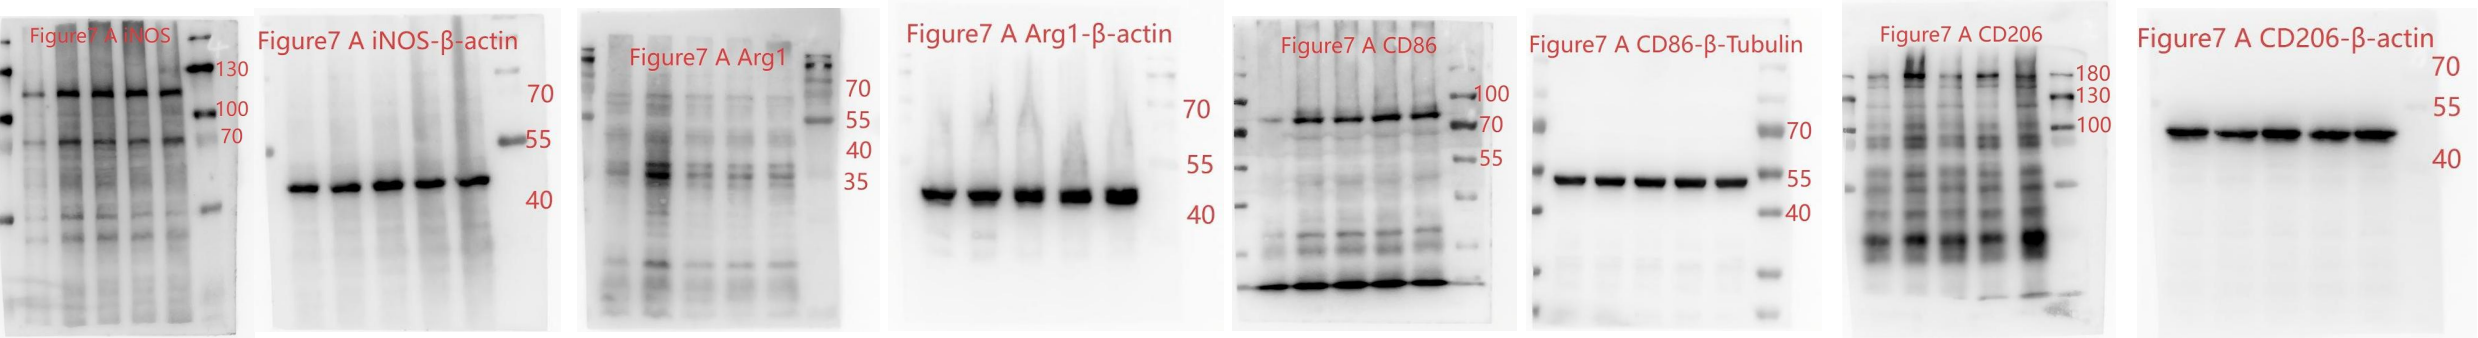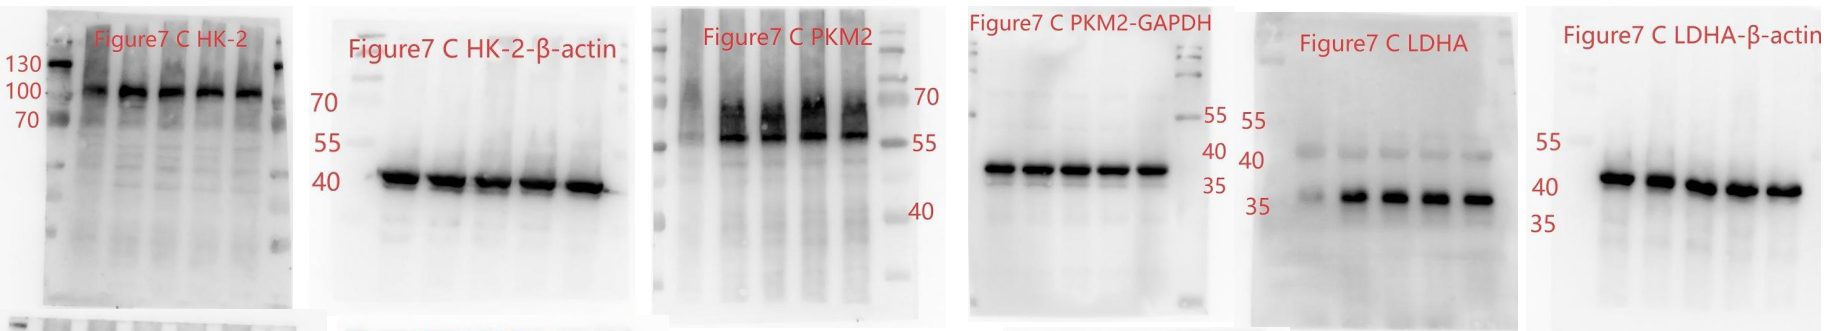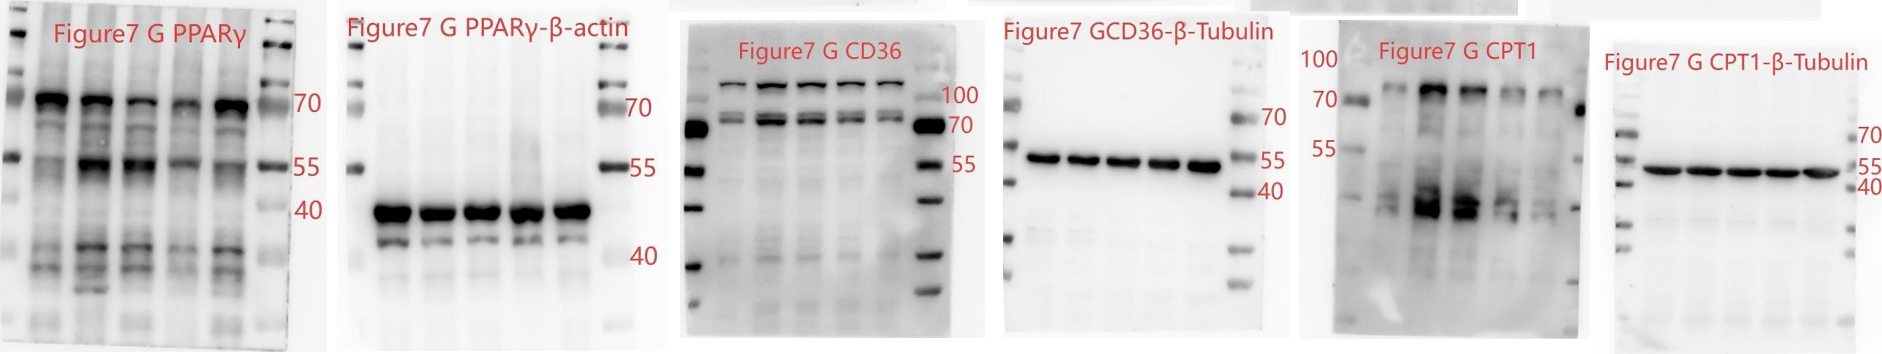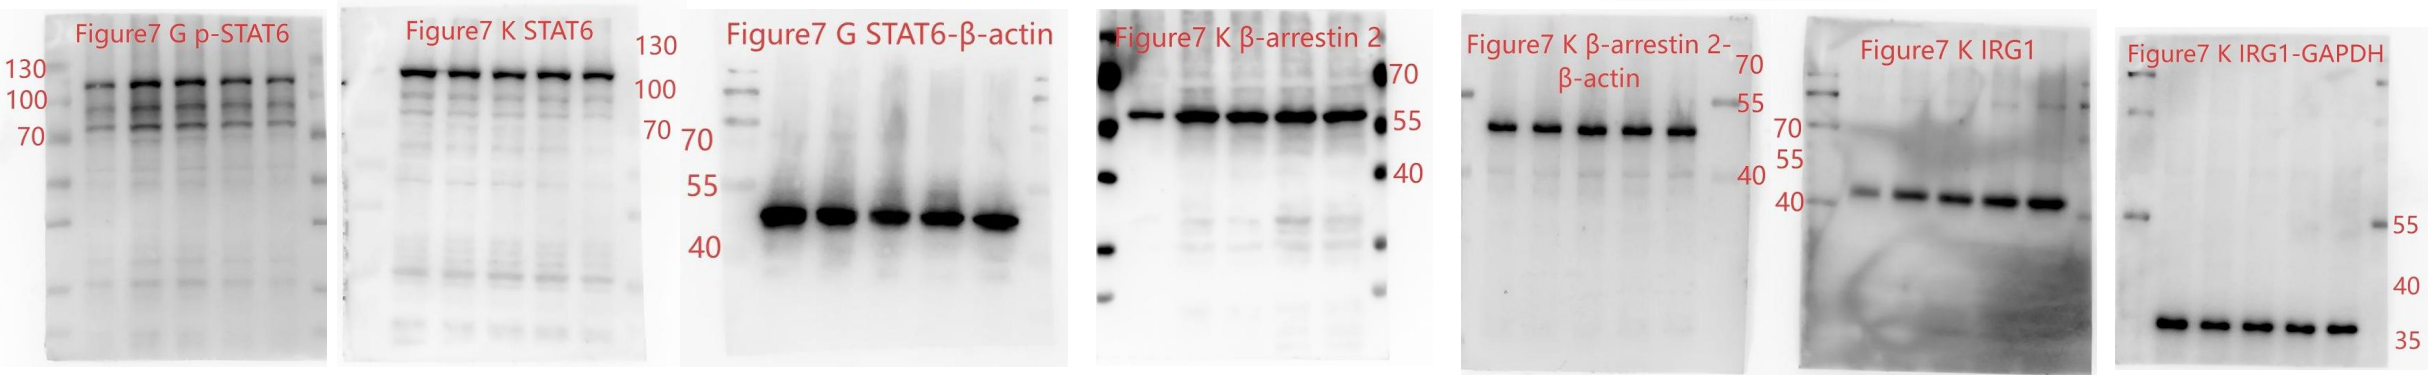

Figure 7 Uncropped western blots
